# Supplementary material for: Construction of nickel and sulfur co-doped carbon nanotubes derived from hydrogen-bonded organic frameworks for efficient biomass electrooxidation
Source: Royal Society of Chemistry journal article supplement (doi:10.1039/d4ta02469a), 2024-01-01
Supplement: d4ta02469a1.pdf [file d4ta02469a1.pdf]

## Supporting Information

# Construction of nickel and sulfur co-existed carbon nanotubes derived from hydrogen-bonded organic framework for efficient biomass electrooxidation

*Yuting Zhang,<sup>a</sup> Junhua Kuang,<sup>a</sup> Jia Yu,<sup>\*a</sup> Yangyang Dong,<sup>a</sup> Jiaran Li,<sup>a</sup> Tianwei Xue,<sup>a</sup> Jing Wu,<sup>a</sup> Junchi Ma,<sup>a</sup> Jinlong Wan,<sup>a</sup> Shiping Zeng,<sup>a</sup> Yong Sun,<sup>a</sup> Yue-Jiao Zhang,<sup>a</sup> Jin-Chao Dong,<sup>a</sup> Li Peng,<sup>\*a</sup> Shuliang Yang<sup>\*a</sup>, and Jian-Feng Li<sup>\*a</sup>*

a. College of Energy, College of Chemistry and Chemical Engineering, Xiamen University, Xiamen 361102, Fujian, PR China. E-mail: yujia@xmu.edu.cn; li.peng@xmu.edu.cn; ysl@xmu.edu.cn; li@xmu.edu.cn

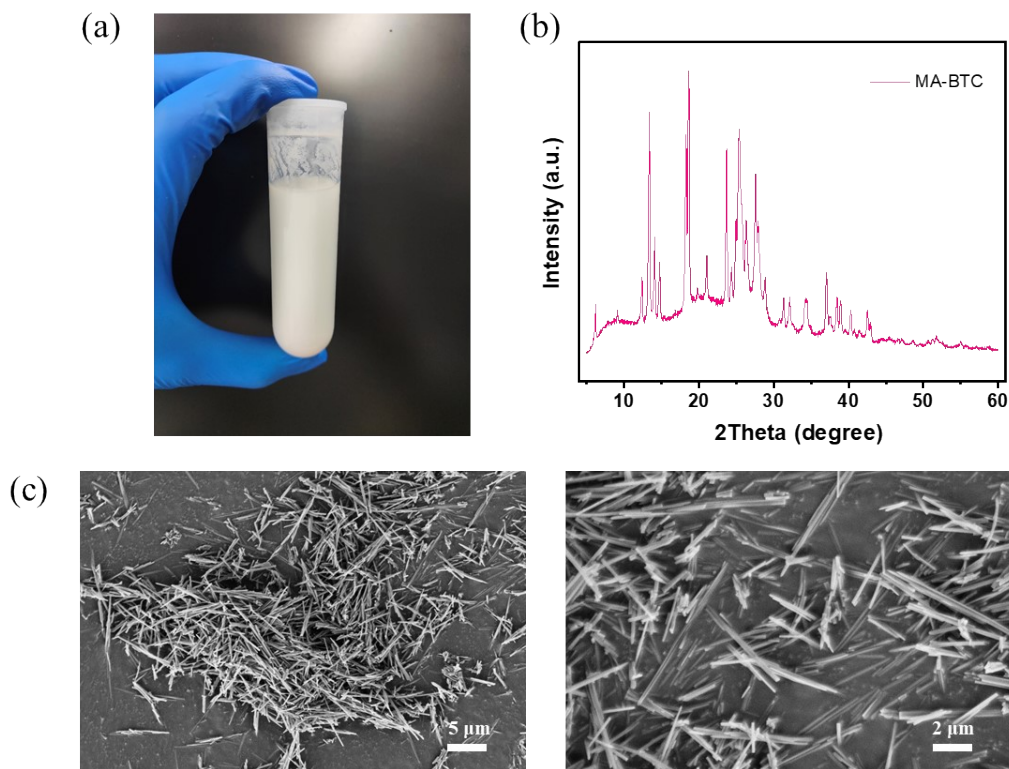

**Figure S1.** (a) Digital photo of MA-BTC HOFs in 35 mL of methanol. It was ultrasonicated for 2 h and then kept still for 20 min. XRD pattern (b) and SEM images (c-d) of the synthesized MA-BTC precursor.

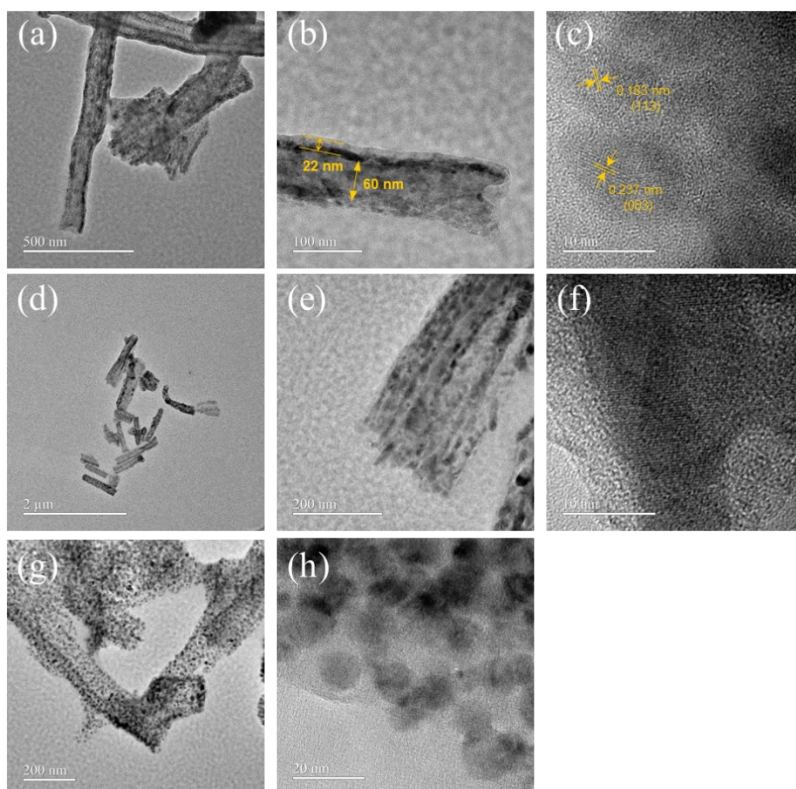

**Figure S2.** TEM images of (a, b)  $\text{Ni}_{2.4}\text{S}_{0.1}@CNTs$ , (d, e)  $\text{NiSO}_4@CNTs$ , and (g)  $\text{Ni}(\text{NO}_3)_2@CNTs$ . HRTEM images of (c)  $\text{Ni}_{2.4}\text{S}_{0.1}@CNTs$ , (f)  $\text{NiSO}_4@CNTs$ , and (h)  $\text{Ni}(\text{NO}_3)_2@CNTs$ .

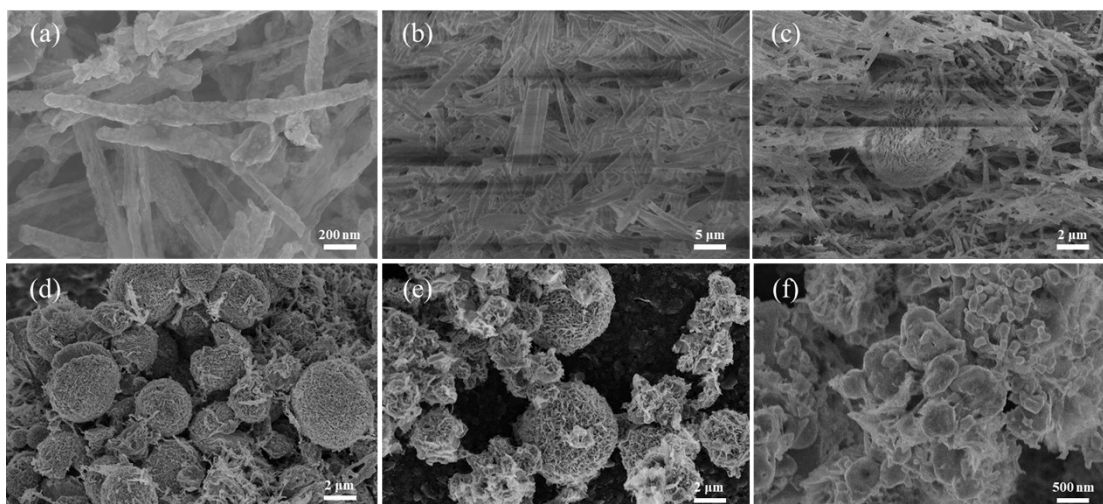

**Figure S3.** SEM images of the catalysts with varying amount of sulfur contents: (a) without additional sulfur; (b) 0.1 mmol of thiourea; (c) 0.3 mmol of thiourea; (d) 0.6 mmol of thiourea; (e) 1.2 mmol of thiourea, and (f) 1.8 mmol of thiourea.

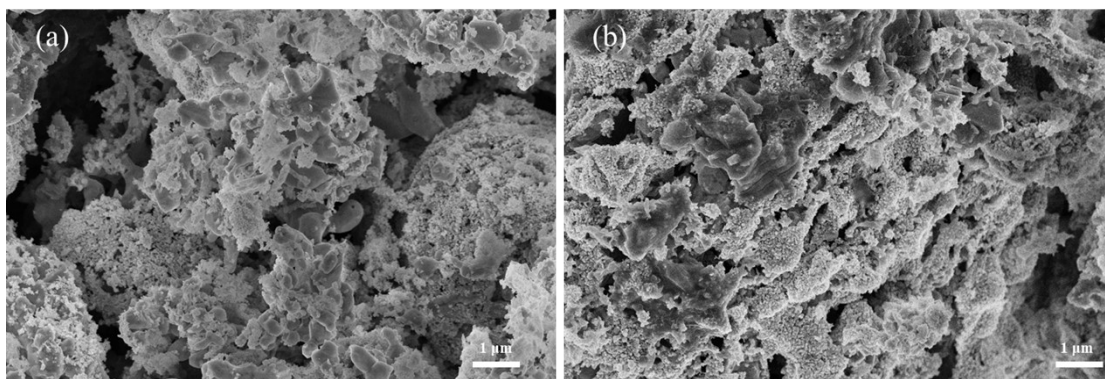

**Figure S4.** SEM images of the catalysts with excessively used NiSO<sub>4</sub>: (a) 3.0 mmol of NiSO<sub>4</sub> and (b) 3.6 mmol of NiSO<sub>4</sub>.

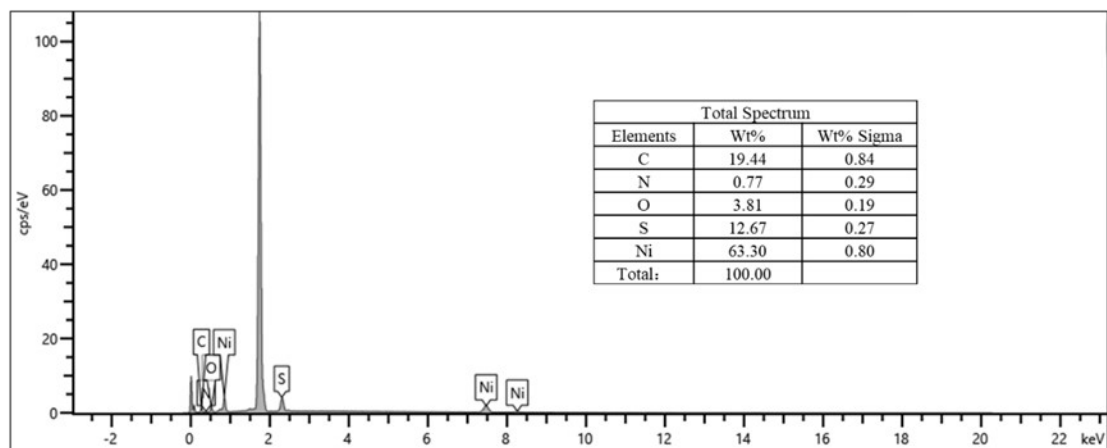

**Figure S5.** SEM-EDS spectrum for Ni<sub>2.4</sub>S<sub>0.1</sub>@CNTs.

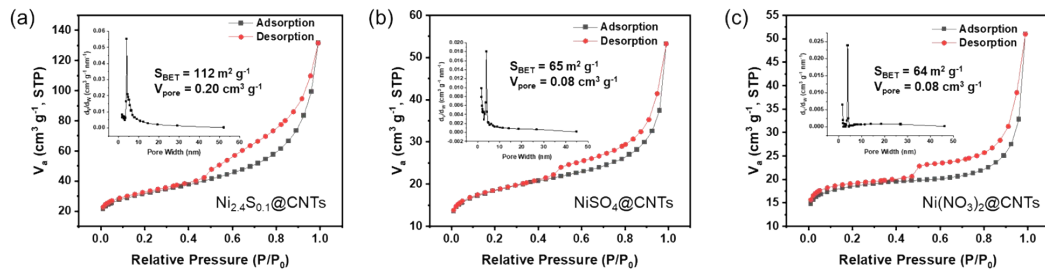

**Figure S6.**  $N_2$  adsorption-desorption isotherms at 77 K of (a)  $\text{Ni}_{2.4}\text{S}_{0.1}@CNTs$ , (b)  $\text{NiSO}_4@CNTs$ , and (c)  $\text{Ni}(\text{NO}_3)_2@CNTs$ .

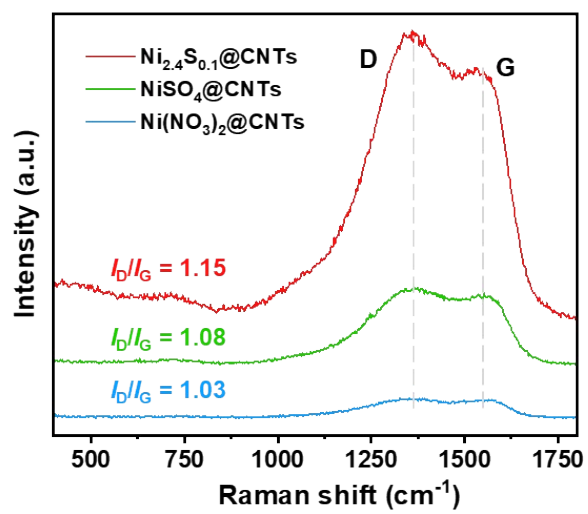

**Figure S7.** Raman spectra of Ni<sub>2.4</sub>S<sub>0.1</sub>@CNTs, NiSO<sub>4</sub>@CNTs, and Ni(NO<sub>3</sub>)<sub>2</sub>@CNTs.



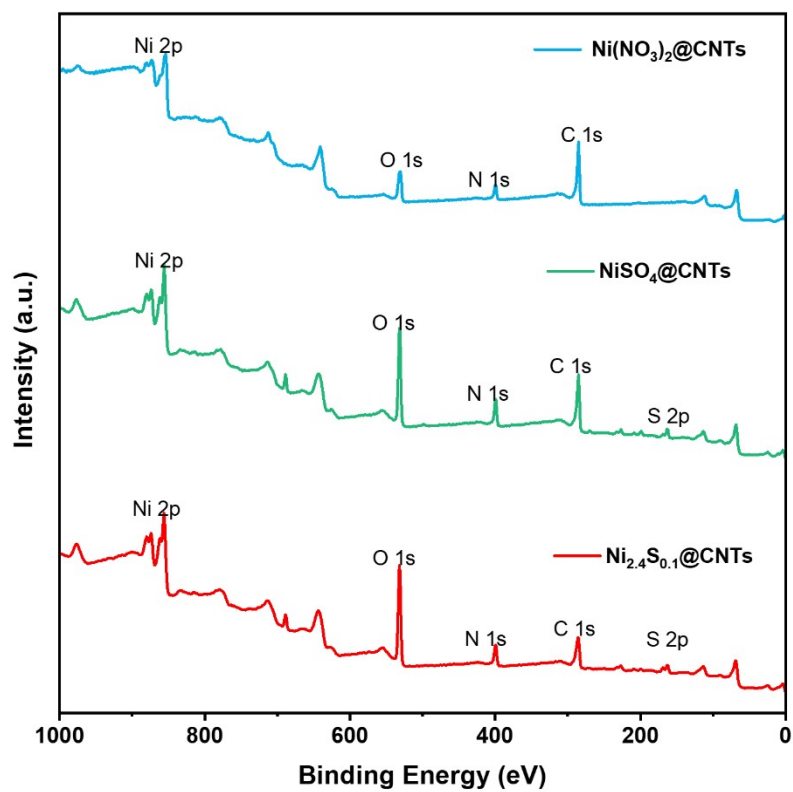

**Figure S8.** XPS survey scan spectra of  $\text{Ni}(\text{NO}_3)_2@\text{CNTs}$  (blue),  $\text{NiSO}_4@\text{CNTs}$  (green), and  $\text{Ni}_{2.4}\text{S}_{0.1}@\text{CNTs}$  (red).

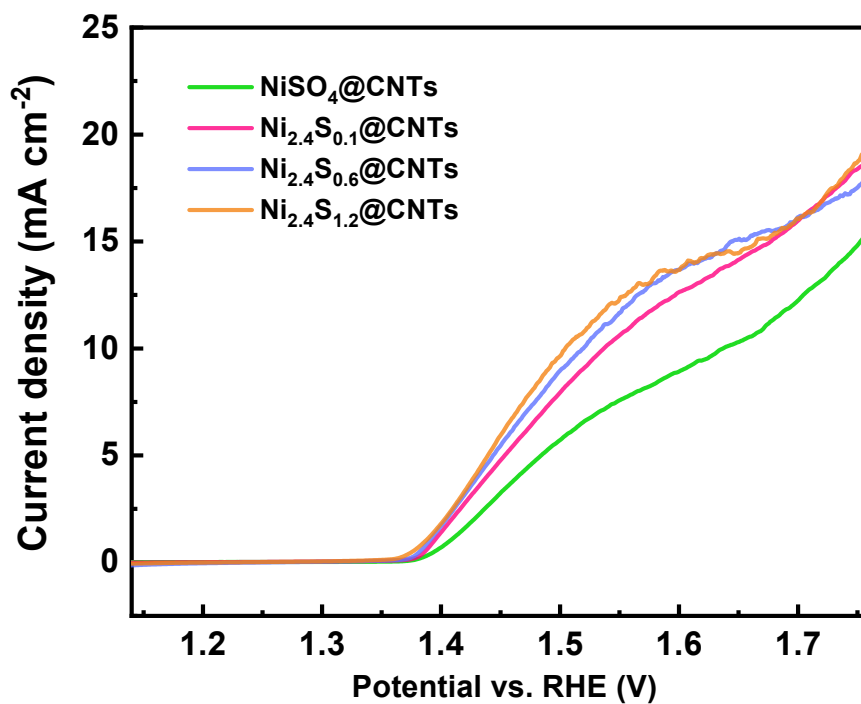

**Figure S9.** LSV curves of NiSO<sub>4</sub>@CNTs (green), Ni<sub>2.4</sub>S<sub>0.1</sub>@CNTs (carmine), Ni<sub>2.4</sub>S<sub>0.6</sub>@CNTs (purple), and Ni<sub>2.4</sub>S<sub>1.2</sub>@CNTs (orange) in 0.1M KOH with 10 mM HMF.

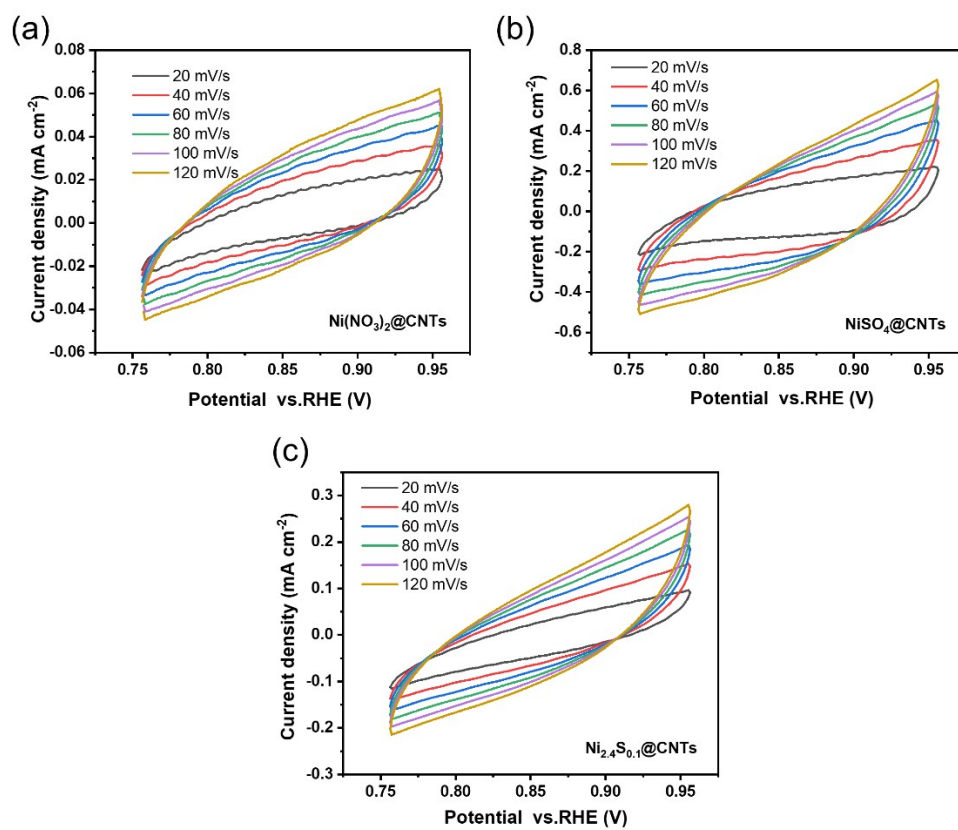

**Figure S10.** Cyclic voltammety curves of: (a) Ni(NO<sub>3</sub>)<sub>2</sub>@CNTs, (b) NiSO<sub>4</sub>@CNTs, and (c) Ni<sub>2.4</sub>S<sub>0.1</sub>@CNTs with different scan rates.

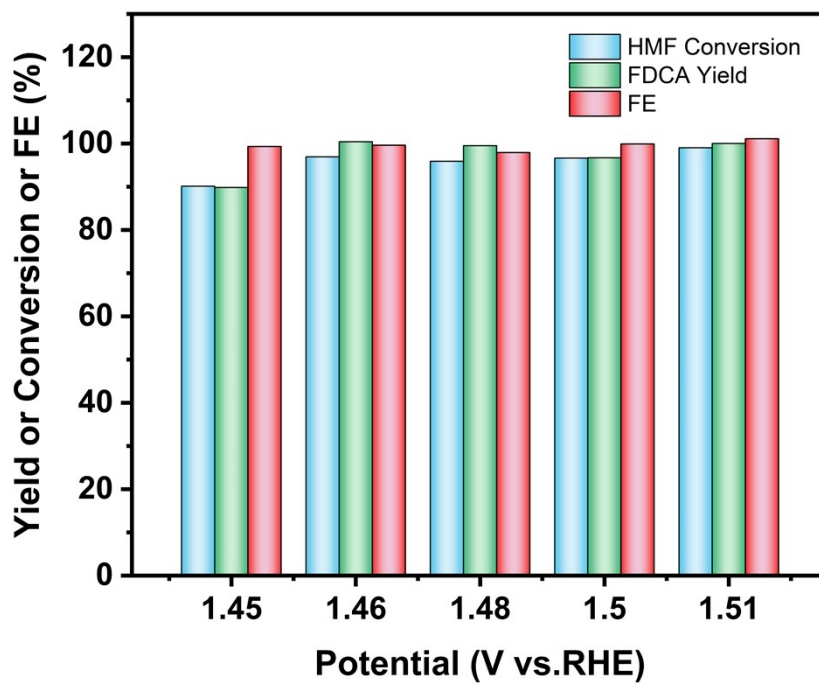

**Figure S11.** HMF conversion, FDCA yield and FE of Ni<sub>2.4</sub>S<sub>0.1</sub>@CNTs at different potentials in 0.1 M KOH with 10 mM HMF.

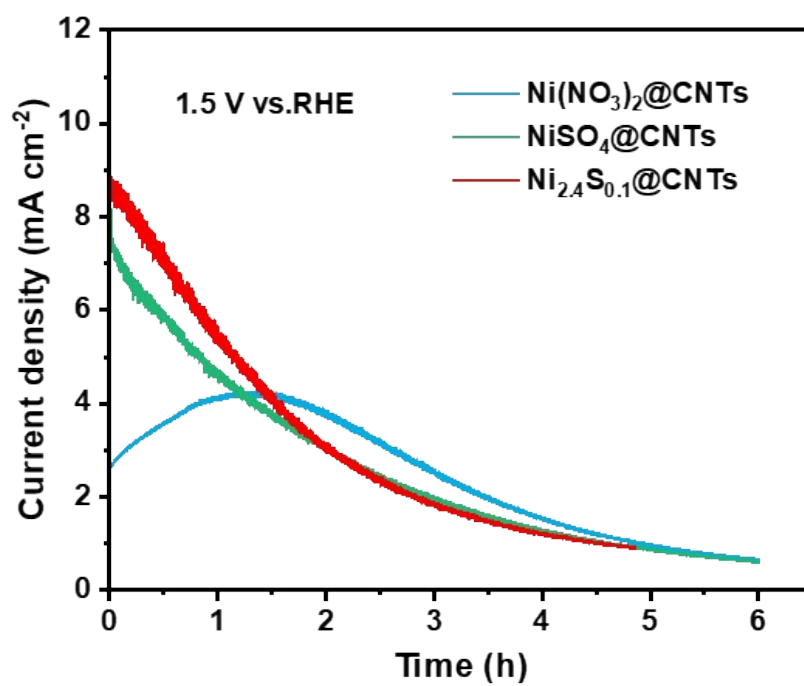

**Figure S12.** Current-time plots for different catalysts derived from chronoamperometry.

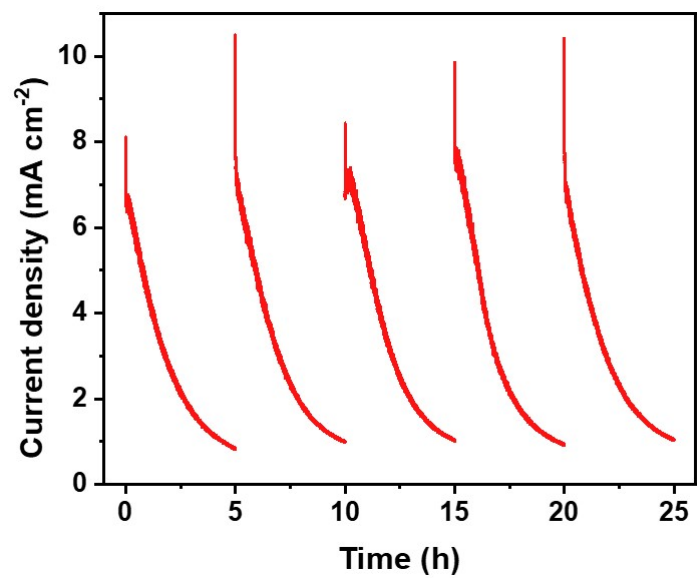

**Figure S13.** Chronoamperometry experiments of Ni<sub>2.4</sub>S<sub>0.1</sub>@CNTs under five successive electrochemical tests for HMFOR.

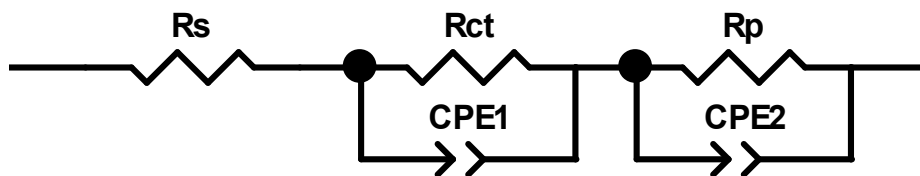

**Figure S14.** The equivalent circuit used for modeling the measured electrochemical response. The equivalent circuit image.  $R_s$  represents the solution resistance,  $CPE_1$  stands for double layer capacitance, the resistance of interface oxidation is denoted as  $R_{ct}$ ,  $CPE_2$  and  $R_p$  are related to the dielectric properties and the resistance of the electrode inner film.

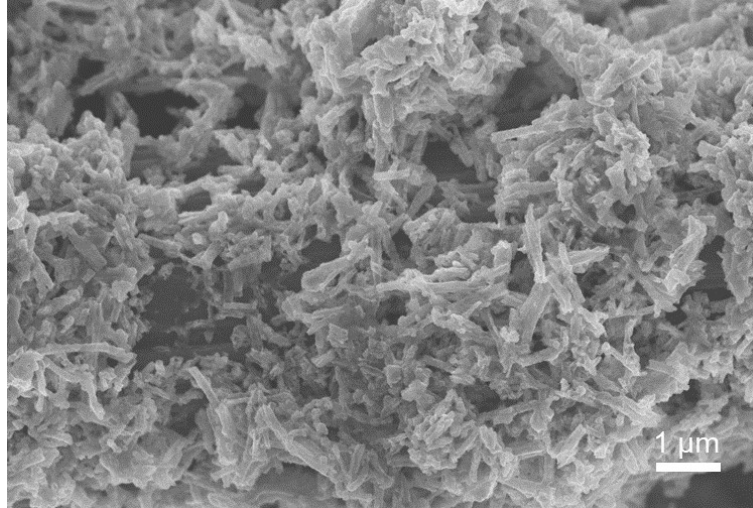

**Figure S15.** SEM image of the nickel and sulfur co-doped nanotube catalyst after the stability cycle test.



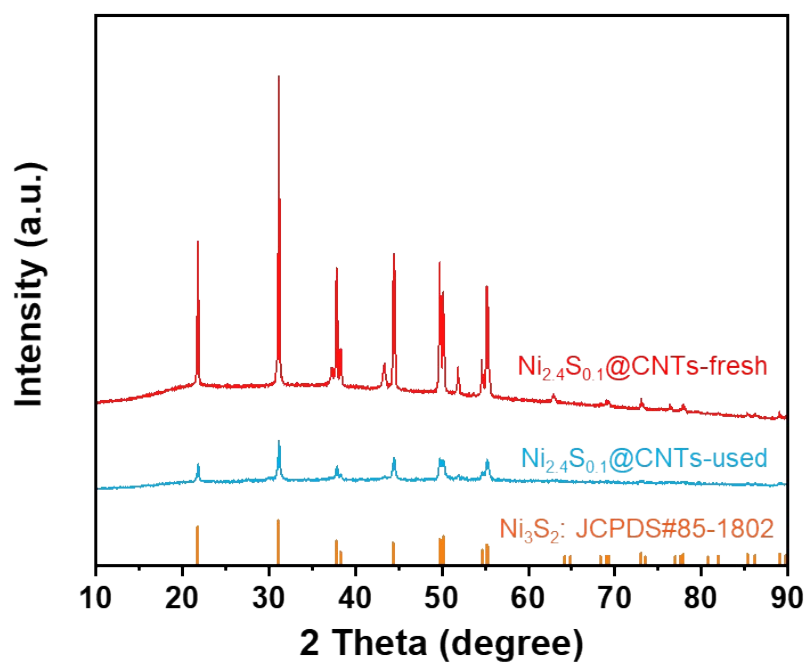

**Figure S16.** XRD pattern of the nickel and sulfur co-doped nanotube catalyst after the stability cycle test.

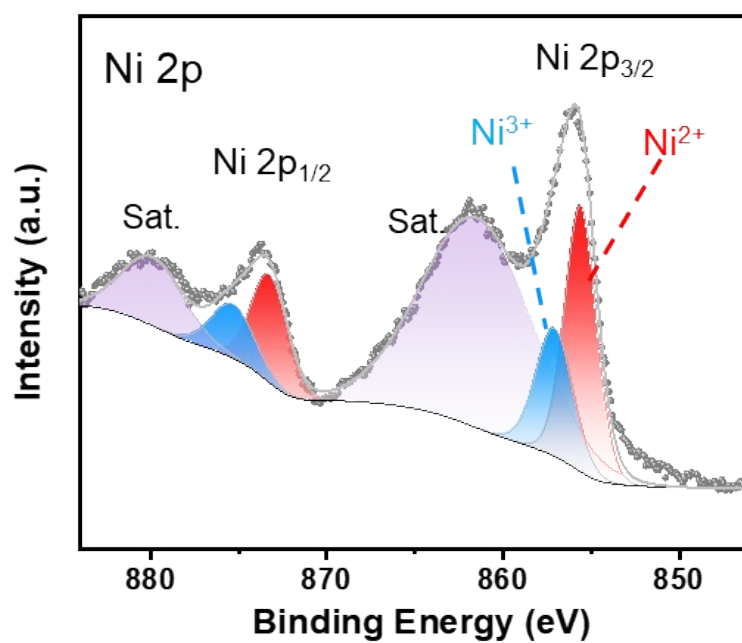

**Figure S17.** XPS spectrum of the nickel and sulfur co-doped nanotube catalyst after the stability cycle test.

**Table S1.** Ni contents of Ni(NO<sub>3</sub>)<sub>2</sub>@CNTs, NiSO<sub>4</sub>@CNTs, and Ni<sub>2.4</sub>S<sub>0.1</sub>@CNTs, determined from ICP-OES measurements.

| Samples                                  | Ni wt% |
|------------------------------------------|--------|
| Ni(NO <sub>3</sub> ) <sub>2</sub> @CNT   | 81.1   |
| s                                        |        |
| NiSO <sub>4</sub> @CNTs                  | 62.4   |
| Ni <sub>2.4</sub> S <sub>0.1</sub> @CNTs | 62.7   |

**Table S2.** The fitted parameters of Nyquist plots of Ni(NO<sub>3</sub>)<sub>2</sub>@CNTs, NiSO<sub>4</sub>@CNTs and Ni<sub>2.4</sub>S<sub>0.1</sub>@CNTs electrodes.

| Samples                                  | <i>R</i> <sub>ct</sub> (Ω) | <i>R</i> <sub>s</sub> (Ω) | <i>C</i> <sub>dl</sub> (F) |
|------------------------------------------|----------------------------|---------------------------|----------------------------|
| Ni(NO <sub>3</sub> ) <sub>2</sub> @CNT   | 3.67                       | 4.13                      | 0.0033                     |
| s                                        |                            |                           |                            |
| NiSO <sub>4</sub> @CNTs                  | 2.52                       | 5.23                      | 0.0068                     |
| Ni <sub>2.4</sub> S <sub>0.1</sub> @CNTs | 2.02                       | 4.93                      | 0.0063                     |

**Table S3.** The resistance of each component for Ni<sub>2.4</sub>S<sub>0.1</sub>@CNTs in 0.1 M KOH with 10 mM HMF.

| Potential (V) | <i>R</i> <sub>s</sub> (Ω) | <i>R</i> <sub>ct</sub> (Ω) | <i>R</i> <sub>p</sub> (Ω) |
|---------------|---------------------------|----------------------------|---------------------------|
| 1.25          | 3.530                     | 79.73                      | 1435                      |
| 1.30          | 3.532                     | 69.35                      | 1057                      |
| 1.35          | 3.547                     | 60.36                      | 483.7                     |
| 1.40          | 3.995                     | 4.492                      | 53.70                     |
| 1.45          | 4.107                     | 2.013                      | 26.19                     |
| 1.50          | 4.126                     | 1.489                      | 13.66                     |
| 1.55          | 4.149                     | 1.223                      | 10.02                     |
| 1.60          | 4.207                     | 1.169                      | 5.768                     |
| 1.65          | 4.361                     | 1.410                      | 3.777                     |
| 1.70          | 4.215                     | 2.107                      | 5.563                     |

**Table S4.** Performance of Ni<sub>2.4</sub>S<sub>0.1</sub>@CNTs catalyst developed in this work (\*) and reported materials for oxidation of 5-hydroxymethylfurfural (HMF) to 2,5-furandicarboxylic acid (FDCA).

| Electrode Material                                    | HMF conc (mM) | Applied potential (V vs. RHE) | FDCA yield (%) | FE of FDC A (%) | Ref.                                                                         |
|-------------------------------------------------------|---------------|-------------------------------|----------------|-----------------|------------------------------------------------------------------------------|
| <b>Ni<sub>2.4</sub>S<sub>0.1</sub>@CNTs</b>           | <b>10</b>     | <b>1.51</b>                   | <b>~96</b>     | <b>~99</b>      | <b>This work</b>                                                             |
| Ni <sub>0.9</sub> Cu <sub>0.1</sub> (OH) <sub>2</sub> | 5             | 1.45                          | 91.2           | 91.2            | <i>J. Mater. Chem. A</i> , 2021, <b>9</b> , 9685-9691. <sup>[1]</sup>        |
| Nanocrystalline Cu                                    | 5             | 1.69                          | 96.4           | 95              | <i>ACS Catal.</i> , 2018, <b>8</b> , 1197-1206. <sup>[2]</sup>               |
| P-HEOs/CP                                             | 10            | 1.50                          | 97.4           | 96.6            | <i>Angew. Chem. Int. Ed.</i> , 2021, <b>60</b> , 20253-20258. <sup>[3]</sup> |
| NiCo <sub>2</sub> O <sub>4</sub>                      | 5             | 1.50                          | 72             | 80              | <i>Appl. Catal., B</i> , 2019, <b>242</b> , 85-91. <sup>[4]</sup>            |
| NiO-CMK-1                                             | 20            | 1.73                          | -              | 51.4            | <i>Adv. Sustainable Syst.</i> , 2020, <b>4</b> , 1900151. <sup>[5]</sup>     |
| NiCoFe-LDHs                                           | 10            | 1.52                          | ~82            | -               | <i>ACS Catal.</i> , 2020, <b>10</b> , 5179-5189. <sup>[6]</sup>              |
| NiCoBDC-NF                                            | 10            | 1.55                          | 99             | 78.8            | <i>J. Mater. Chem. A</i> , 2020, <b>8</b> , 20386-20392. <sup>[7]</sup>      |
| Ni <sub>0.5</sub> Co <sub>2.5</sub> O <sub>4</sub>    | 50            | 1.45                          | 92.4           | 90.3            | <i>ACS Catal.</i> , 2022, <b>12</b> , 4242-4251. <sup>[8]</sup>              |
| Pt/Ni(OH) <sub>2</sub>                                | 50            | 1.61                          | 98.7           | 99              | <i>Angew. Chem. Int. Ed.</i> , 2021, <b>60</b> , 22908-22914. <sup>[9]</sup> |
| CuO-PdO                                               | 50            | 1.41                          | 96.2           | 93.7            | <i>Adv. Mater.</i> , 2022, <b>34</b> , 2204089. <sup>[10]</sup>              |

## Reference

1. J. Zhang, P. Yu, G. Zeng, F. Bao, Y. Yuan and H. Huang, *J. Mater. Chem. A*, 2021, **9**, 9685-9691.
2. D.-H. Nam, B. J. Taitt and K.-S. Choi, *ACS Catal.*, 2018, **8**, 1197-1206.
3. K. Gu, D. Wang, C. Xie, T. Wang, G. Huang, Y. Liu, Y. Zou, L. Tao and S. Wang, *Angew. Chem. Int. Ed.*, 2021, **60**, 20253-20258.
4. M. J. Kang, H. Park, J. Jegal, S. Y. Hwang, Y. S. Kang and H. G. Cha, *Appl. Catal., B*, 2019, **242**, 85-91.
5. F. J. Holzhäuser, T. Janke, F. Öztas, C. Broicher and R. Palkovits, *Adv. Sustainable Syst.*, 2020, **4**, 1900151.
6. M. Zhang, Y. Liu, B. Liu, Z. Chen, H. Xu and K. Yan, *ACS Catal.*, 2020, **10**, 5179-5189.
7. M. Cai, Y. Zhang, Y. Zhao, Q. Liu, Y. Li and G. Li, *J. Mater. Chem. A*, 2020, **8**, 20386-20392.
8. Y. Lu, T. Liu, Y.-C. Huang, L. Zhou, Y. Li, W. Chen, L. Yang, B. Zhou, Y. Wu, Z. Kong, Z. Huang, Y. Li, C.-L. Dong, S. Wang and Y. Zou, *ACS Catal.*, 2022, **12**, 4242-4251.
9. B. Zhou, Y. Li, Y. Zou, W. Chen, W. Zhou, M. Song, Y. Wu, Y. Lu, J. Liu, Y. Wang and S. Wang, *Angew. Chem. Int. Ed.*, 2021, **60**, 22908-22914.
10. P. Zhou, X. Lv, S. Tao, J. Wu, H. Wang, X. Wei, T. Wang, B. Zhou, Y. Lu, T. Frauenheim, X. Fu, S. Wang and Y. Zou, *Adv. Mater.*, 2022, **34**, 2204089.
